# 1 Implications of climatic and demographic change for 2 seasonal influenza dynamics and evolution

3 Rachel E. Baker<sup>1,2\*</sup>, Qiqi Yang<sup>2</sup>, Colin J. Worby<sup>3</sup>, Wenchang Yang<sup>4</sup>, Chadi M.  
4 Saad-Roy<sup>5</sup>, Cecile Viboud<sup>6</sup>, Jeffrey Shaman<sup>7</sup>, C. Jessica E. Metcalf<sup>2,8</sup>, Gabriel  
5 Vecchi<sup>4</sup>, Bryan T. Grenfell<sup>2,6,8</sup>

6 February 12, 2021

7 <sup>1</sup> Princeton Environmental Institute, Princeton University, Princeton, NJ, USA.

8 <sup>2</sup> Department of Ecology and Evolutionary Biology, Princeton University, Princeton, NJ,  
9 USA.

10 <sup>3</sup> Broad Institute, Cambridge, MA, USA

11 <sup>4</sup> Department of Geosciences, Princeton University, Princeton, NJ, USA.

12 <sup>5</sup> Lewis-Sigler Institute for Integrative Genomics, Princeton University

13 <sup>6</sup> Division of International Epidemiology and Population Studies, Fogarty International  
14 Center, National Institutes of Health, Bethesda, MD, USA.

15 <sup>7</sup> Department of Environmental Health Sciences, Mailman School of Public Health, Columbia  
16 University, New York, USA.

17 <sup>8</sup> School of Public and International Affairs, Princeton University, Princeton, NJ, USA.

18  
19 \*To whom correspondence should be addressed; E-mail: [racheleb@princeton.edu](mailto:racheleb@princeton.edu).

## 20 **Abstract**

21 Seasonal influenza causes a substantial public health burden, as well as being a key substrate  
22 for pandemic emergence. Future climatic and demographic changes may alter both the mag-  
23 nitude, frequency and timing of influenza epidemics and the prospects for pathogen evolution,  
24 however, these issues have not been addressed systematically. Here, we use a parsimonious  
25 influenza model, grounded in theoretical understanding of the link between climate, demogra-  
26 phy and transmission to project future changes globally. We find that climate change generally  
27 acts to reduce the intensity of influenza epidemics as specific humidity increases. However,  
28 this reduction in intensity is accompanied by increased seasonal epidemic persistence with lati-  
29 tude, which may increase suitability for year-round local influenza evolution. Using a range of  
30 population growth scenarios, we find that the number of global locations with high evolution  
31 suitability may double by 2050. High population growth in tropical Africa could thus make this  
32 region a locus of novel strain emergence, shifting the current focus from South East Asia.

## 33 **Introduction**

34 Climatic and demographic change will alter the landscape of infectious disease burden over the  
35 coming century [1, 2]. Characterizing these changes is a key public health challenge, and will  
36 determine our ability to predict and respond to future outbreaks. While advances have been  
37 made in characterizing the future of vector-borne diseases [3, 4, 5], less attention has been paid  
38 to directly-transmitted infections, despite evidence that climate and demography play a crucial  
39 role in determining the timing and intensity of these types of outbreaks [6, 7, 8]. Both laboratory  
40 and observational studies have uncovered a role for climate in driving influenza transmission  
41 [9, 10]. Demographic factors, such as population size and the recruitment of new susceptibles,  
42 are of great importance for driving disease dynamics, particularly for immunizing infections [8,  
43 11, 12]. The high mortality burden from seasonal influenza, and lack of a consistently effective  
44 vaccine in the face of immune escape, makes characterizing future changes an important task

45 [13, 14, 15]. Pandemic influenza is also a major potential threat, but complex drivers make  
46 potential climatic and demographic links elusive.

47 Influenza cases display distinct seasonal cycles, depending on latitude. In temperate lo-  
48 cations at northern and southern latitudes, influenza epidemics are strongly seasonal, with  
49 high numbers of cases in the winter months and close to zero cases in the summer months  
50 [16, 8]. In tropical locations, epidemic patterns are less distinct and cases persist throughout  
51 the year, though higher case numbers have been observed during periods of elevated rainfall  
52 [16, 17, 18, 19]. Specific humidity has been shown to play a role in driving these seasonal  
53 dynamics [20, 10, 21, 9]. Low specific humidity is correlated with increased influenza trans-  
54 mission and virus survival [20, 22], and has been shown to increase transmission in laboratory  
55 settings [21, 9, 20]. Large seasonal fluctuations in specific humidity can explain the intensity  
56 of outbreaks in temperate regions [10, 8]. More moderate variability in humidity, closer to the  
57 equator, can explain the less distinct influenza seasonality in tropical regions [22, 16].

58 A key challenge for influenza control is that gradual evolution of the virus's surface gly-  
59 coproteins (hemagglutinin and neuraminidase) leads to immune escape, a process known as  
60 antigenic drift [13]. This allows the virus to evade prevailing host population immunity, con-  
61 tributing to the high disease burden of influenza and the difficulty in providing a comprehensive  
62 vaccine [13, 14]. The population-level dynamics of seasonal influenza may influence the evo-  
63 lution of the influenza virus [23]. In temperate locations, a virus population bottleneck driven  
64 by the lack of cases in the summer months seasonally limits this local evolution [19, 14, 24].  
65 In contrast, the continual circulation of the virus in populous tropical locations is expected to  
66 play an important role in the emergence of novel strains [25, 19, 16, 26, 27, 28, 14]. High and  
67 persistent viral abundance is theoretically linked to a higher population mutation rate, and there-  
68 fore increased genetic diversity [29], as well as allowing for the importation and propagation of  
69 novel strains from other locations [27, 24].

70 Here we leverage a humidity-dependent influenza model, based on laboratory and obser-  
71 vational studies [20], to predict population-level seasonal influenza dynamics globally. Using

72 this model, we consider how changes to the climate will alter future influenza dynamics and  
73 how these changing dynamics may influence evolution. We project future influenza changes by  
74 coupling the influenza model to both highly resolved climate data from the present, and future  
75 climate changes projected by the Coupled Model Intercomparison Project phase 5 (CMIP5).  
76 We also consider how changes to future populations may affect the absolute depth of incidence  
77 troughs. Using population projections, in concert with climate change simulations, we evaluate  
78 future patterns of evolution propensity. Capturing the full dynamics of seasonal influenza evo-  
79 lution is a formidable task with many remaining uncertainties [30, 31, 32]; we therefore adopt a  
80 more synoptic approach. Population genetics theory suggests we can approximate the propen-  
81 sity for local evolution in terms of local persistence through the seasonal cycle i.e. the depth of  
82 incidence troughs [29, 33]. Our metric for year-round evolution suitability is *harmonic mean*  
83 *incidence* (HMI), which is correlated with trough depth, and shown to be related to pathogen  
84 genetic diversity [29, 34, 35, 36, 33] (Fig. 2, Fig. S2, see Methods).

## 85 **Results**

86 Greenhouse gas induced climate change will lead to an increase in global temperatures and a  
87 corresponding increase of mean specific humidity (Fig. 1a). Specific humidity and influenza  
88 transmission have an inverse relationship in our model [10, 20] (Fig. S1). As specific humidity  
89 increases the basic reproductive number  $R_0$  (a measure of transmission defined as the number  
90 of secondary cases from a primary infection in a completely susceptible population) is expected  
91 to decline slightly (Fig. 1b). These declines will be non-uniform throughout the year such that  
92 the seasonal range of effective reproductive numbers will increase in some locations and decline  
93 in others (Fig. 1c).

94 We run our influenza model for each location in our dataset using the projected transmis-  
95 sion rates, setting population to one so that our results are the proportion of individuals in the  
96 susceptible, infected and recovered class. Fig 1d shows the change in peak annual incidence in  
97 our 2100 simulation versus 2010 simulation. As expected from a general humidity increase, in

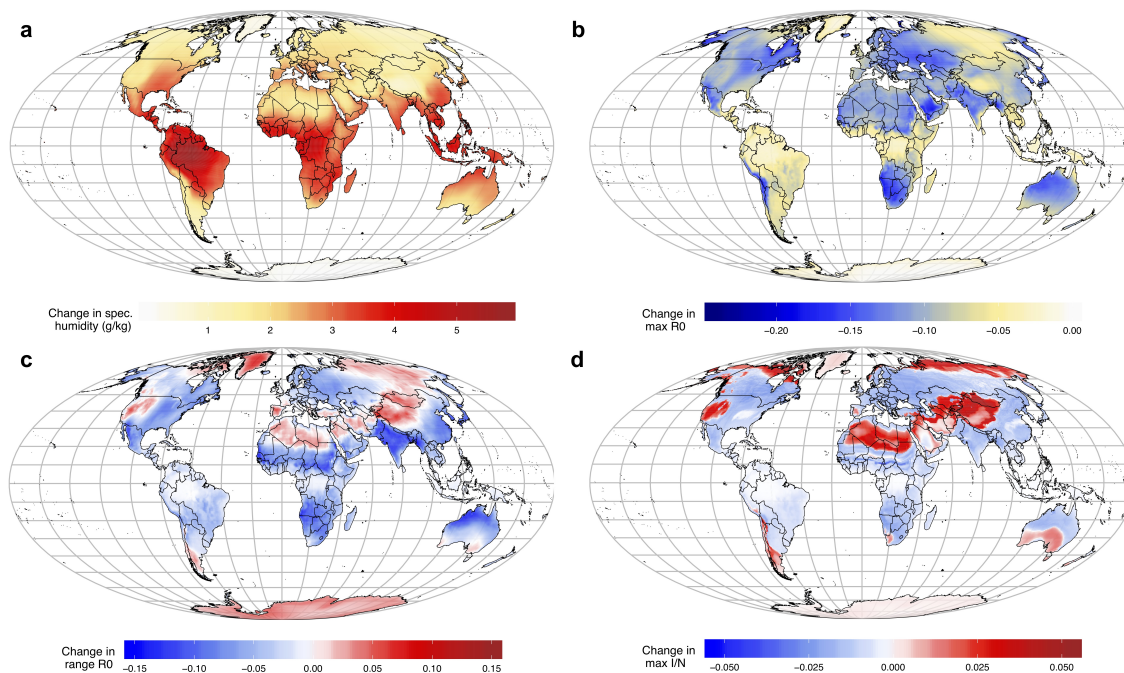

Figure 1: **Climate change and influenza transmission.** Projected 2010-2100 changes, based on CMIP5 multi-model mean under the RCP8.5. scenario, to a) annual mean specific humidity b) annual maximum  $R_0$  c) seasonal range in  $R_0$  d) seasonal max incidence per population (proportion of individuals in the infected category).

98 most locations peak incidence declines, meaning that climate change will lead to less intense  
99 outbreaks of influenza in the future. For some locations, we see an increase in intensity, though  
100 this tends to happen in less populous areas, such as desert locations (we address population  
101 distributions explicitly below).

102 These changes to dynamics may affect the evolution of the influenza virus. Harmonic mean  
103 incidence (HMI), a measure of the extent to which incidence persists throughout the year, is  
104 expected to increase with climate change in tropical locations (as detailed below, Fig. 3). Har-  
105 monic mean incidence can be used to approximate the population bottleneck that seasonal in-  
106 fluenza virus faces in locations where cases go to zero during certain months. Places with very  
107 low (close to zero) HMI will experience a bottleneck, whereas places with high HMI will have  
108 more opportunities for year-round local evolution.

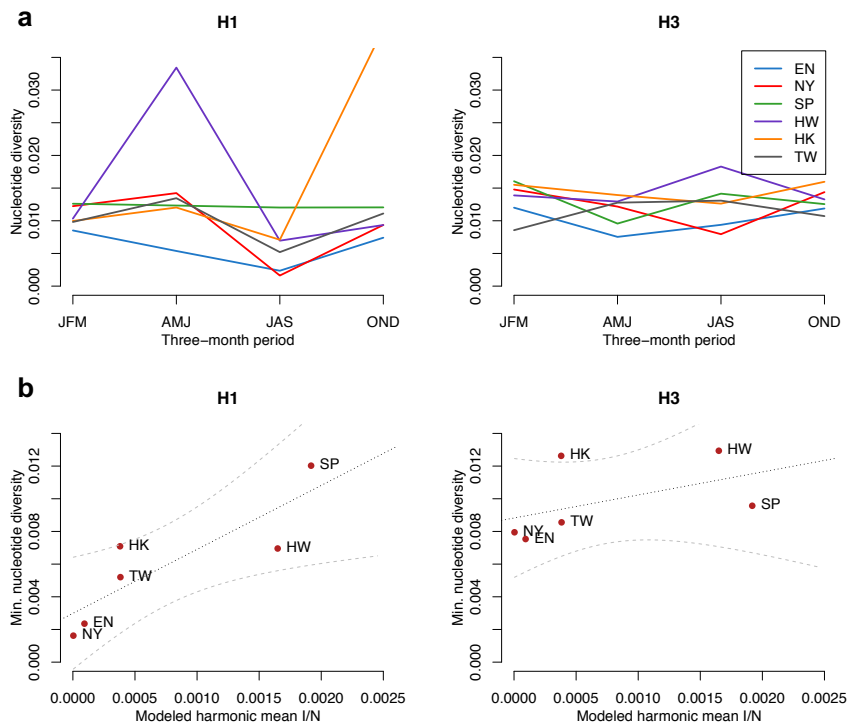

Figure 2: **Nucleotide diversity and HMI.** Average nucleotide diversity for six locations (England (EN), New York state (NY), Singapore (SP), Hawaii (HW), Hong Kong (HK) and Taiwan (TW)) for influenza subtypes H1NX and H3NX. Nucleotide diversity is plotted by season in a). Seasonal minimum nucleotide diversity is plotted against modelled harmonic mean incidence in b).

109 We test this hypothesis using phylogenetic data from six global locations for influenza A  
 110 subtype H1NX and influenza A subtype H3NX. We chose locations across a range of tropical  
 111 and temperate climates where there is sufficient data to estimate nucleotide diversity. Despite  
 112 this, the data is likely biased by different sampling procedures across locations and time points.  
 113 As such, we can only draw qualitative conclusions from the strain data.

114 Fig. 2a shows the nucleotide diversity for H1NX and H3NX subtypes in six locations,  
 115 averaged by season (three-month period, starting in January). Broadly, we observe that locations  
 116 with a more tropical climate, such as Hawaii, tend to experience year-round higher diversity  
 117 of strains. Locations in more temperate regions, such as England, tend to experience lower  
 118 year-round diversity. However, there are subtle effects across subtype and season. New York,

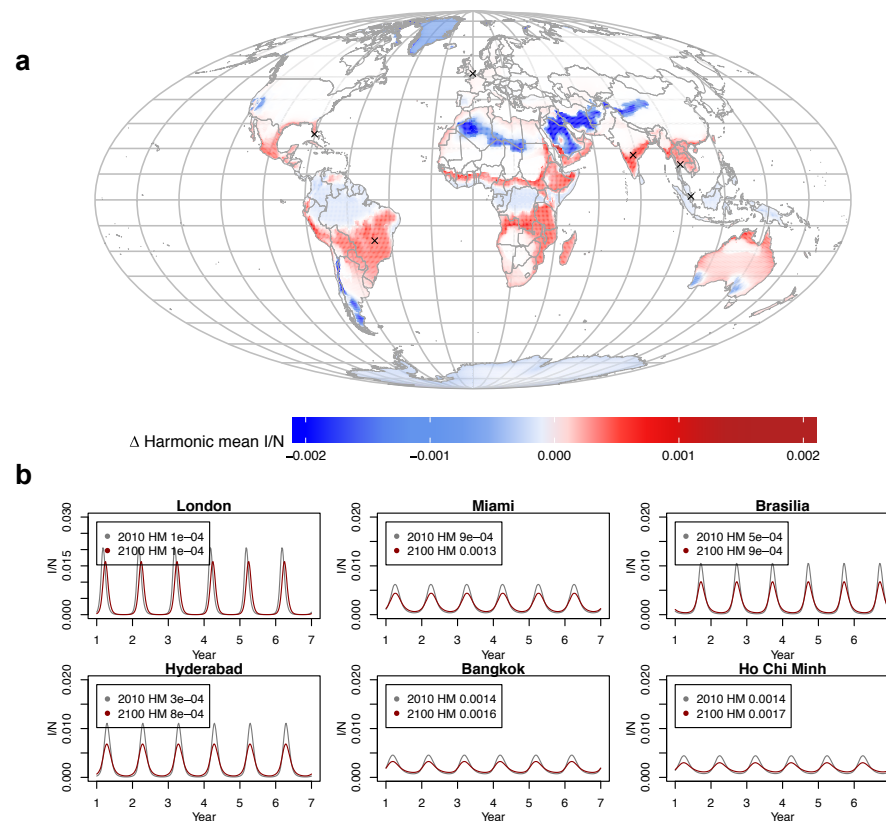

Figure 3: **Climate and harmonic mean incidence (2010-2100)**. a) The effect of climate change on harmonic mean incidence per capita (HMI\*), globally. Example locations for subfigure b are shown with "x". b) Modelled incidence time series in 2010 versus 2100 for example cities representing a range of spatial locations and potential changes (additional examples shown in Fig. S4). HMI\* is shown in the legend.

119 a temperate location, experiences relative high diversity of H3NX strains in January-March,  
120 when case numbers are highest, with diversity declining in the later summer. Fig. 2b shows  
121 the minimum seasonal nucleotide diversity plotted against modeled harmonic mean incidence.  
122 We use modeled HMI\* (\* denotes per capita), as opposed to observed HMI\*, because different  
123 definitions are used to record influenza cases across locations (for example, Taiwan records  
124 severe complicated influenza and the US records influenza-like illnesses). Using the HMI\*  
125 predicted by our model provides both a common definition, while allowing us to investigate the  
126 predictive power of our approach. We find a significant positive relationship between modeled

127 HMI\* and minimum nucleotide diversity for H1NX ( $p = 0.029$ ) and a positive, non-significant  
128 relationship for H3NX ( $p = 0.320$ ) (though we have very limited data points in both cases).  
129 The relationship is stronger for H1NX diversity, where Hawaii appears to have approximately  
130 4 times the diversity of New York. The relationship is weaker for H3NX where Hawaii has  
131 approximately 1.6 times the diversity of New York.

132 Fig 3a shows the global change in HMI\* between 2010 and 2100 due to climate change. An  
133 increase in HMI\* is visible as an expansion around the tropics. Fig 3b shows model projections  
134 for different example locations. High latitude locations, such as London, see minimal changes  
135 to HMI\*, whereas mid-latitude locations, such as Hyderabad, see larger changes. Based on our  
136 fitted model, the change in HMI\* in Hyderabad between 2010 and 2100 would lead to a 47%  
137 increase in minimum nucleotide diversity based on H1NX and a 8% increase based on H3NX.  
138 Similarly, Miami would be see a predicted 24% (H1) and 6% (H3) increase.

139 While Fig. 3a suggests that climate change will lead to an increased global area with suit-  
140 able conditions for year-round influenza evolution, this does not take into account the spatial  
141 distributions of human populations, which are required to sustain the influenza epidemic. We  
142 consider the effect of population growth, in concert with climate change, on our measure of  
143 year-round influenza evolution suitability. To do this we multiply population numbers in each  
144 location by the present or projected HMI\*. We note that our measure of nucleotide diversity in  
145 Fig. 2 is divided by the number of samples - total nucleotide diversity is not observed but is  
146 also expected to scale with population. We find that in 2010, the majority of locations with high  
147 HMI are located in Asia (Fig 4a). This supports earlier findings that influenza evolution in this  
148 region may seed global strains [27, 37]. However, when we consider future population growth,  
149 we find substantial increases to HMI occur in the African continent, such that this region be-  
150 comes a locus of high genetic diversity (Fig. S7,S8). At the same time, we find that HMI in  
151 Asia will also continue to grow over the coming century.

152 Fig. 4b shows the percentage growth in total HMI relative to 2010. Here, we define total  
153 HMI as the sum of estimated HMI across all locations. We consider three scenarios: the effect



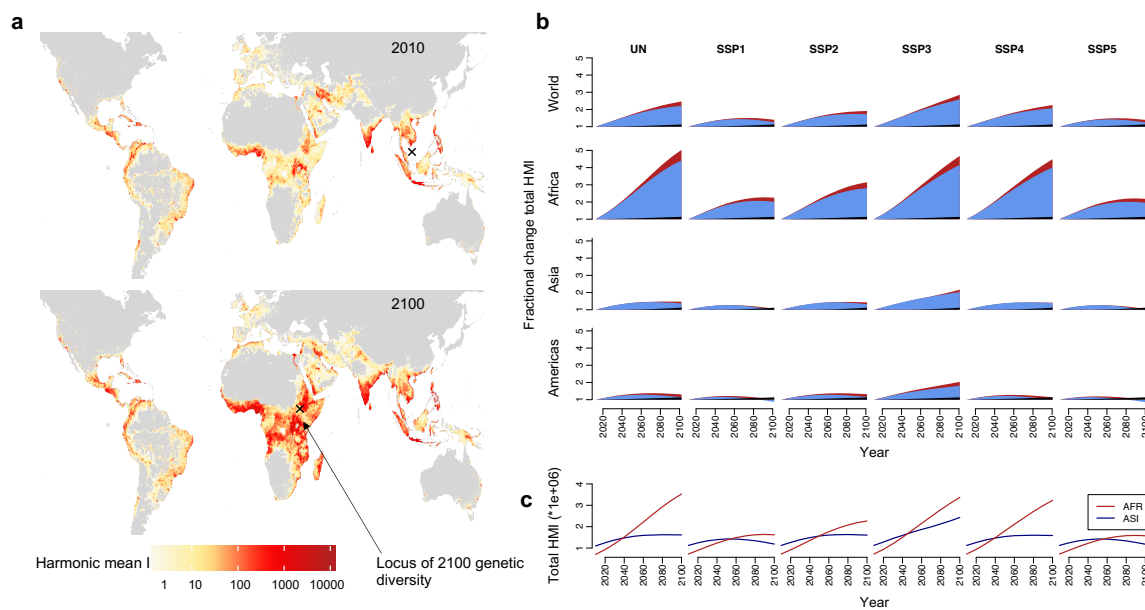

Figure 4: **Population effects on harmonic mean incidence (2010-2100)**. a) Map of projected harmonic mean incidence in 2100 and 2010, based on CMIP5 RCP8.5 climate projections and UN population projections. "x" is the locus of genetic diversity in 2010 and 2100 (see Methods) b) The effect of climate (black), population (blue), combined (red) on fractional change in total harmonic mean incidence (number of pixels\*HMI), relative to 2010 baseline. Different population growth scenarios are shown in columns. Different locations are shown in rows. c) The total harmonic mean incidence in African and Asia from 2010 to 2100. Model in all plots is run with  $R_{min} = 1.2$  and  $R_{max} = 2.2$ .

154 of climate change alone, the effect of population growth alone and the combined effect. We  
 155 also consider different population growth scenarios, as defined by the shared socioeconomic  
 156 pathways, as well as UN projections for country-level population growth [38] (results using  
 157 different Representative Concentration Pathways, shown in Fig. S5). Across all scenarios, the  
 158 African continent sees a significant increase in HMI, driven primarily by population growth  
 159 (Fig. 4b). In the most extreme scenario, the area with high HMI in Africa increases by a factor  
 160 of 5 in 2100 relative to 2010. In all scenarios, Africa exceeds Asia as the primary location for  
 161 influenza evolution at some point in the mid-21st century (Fig. 3c). Further, in all population  
 162 scenarios, global suitability for evolution doubles in the coming century (first row Fig.4b).

163 Although population growth (blue slice in Fig. 4b) dominates the picture, the impact of  
164 climate change (black slice Fig. 4b) is not negligible. Without population growth, climate  
165 change leads to a net 13% increase in evolution suitability globally by 2100. The coupled  
166 effect of climate change and population growth lead to the largest changes in HMI surface  
167 area. Climate change leads to an additional 14% - 27% increase in HMI surface area by 2100  
168 globally, depending on population growth scenario. For some countries, climate change plays  
169 an even bigger relative role. In the Americas climate change increases evolution suitability by  
170 13%, with population changes alone leading to a comparable 14% change, in the UN growth  
171 scenario.

## 172 Discussion

173 Our results imply that climate change will lead to more persistent outbreaks of influenza, with a  
174 average reduction in the size of seasonal peaks. We find that increased persistence, as measured  
175 by harmonic mean incidence, is correlated with year-round diversity of influenza strains and  
176 climate change may have subtle but important impact on increasing year-round strain diversity  
177 across locations. In contrast, we find that the rapid increase in global population projected  
178 over the coming century could have a substantial impact on influenza strain diversity. Higher  
179 population numbers located in increasingly dense urban locations in the tropics, where climate  
180 maintains year-round circulation of the virus, could lead to an increase in total strain diversity.  
181 In particular, we find that locus of diversity shifts from Asia in 2010 to Africa in 2100.

182 There are important caveats to these results. Primarily, the link between the size of pop-  
183 ulation bottleneck and genetic diversity, or HMI and genetic diversity, remains controversial.  
184 Some studies assert that influenza evolution does not occur in a particular location, but hap-  
185 pens as strains circulate globally [24]. A highly mobile population in Asia may contribute to  
186 current strain emergence in this region [27, 37]. We expect that even within this scenario, the  
187 existence of higher host numbers driven by population growth, as well as increased mobility,  
188 should heighten the risk of evolving novel strains. Urbanization may also lead to more persis-

189 tent outbreaks, potentially affecting evolution [8]. However more work is needed to connect  
190 influenza evolutionary patterns, via phylogenetic analyses, with empirical data on climate and  
191 demographics. The impact of climate, as well as animal and human population distributions,  
192 on future pandemics is also an important question, albeit a difficult one to address.

193 Our climate change projections for influenza incidence support earlier work suggesting sea-  
194 sonal epidemics may become milder as the climate warms [39]. An obvious corollary is that we  
195 should observe a lower reproduction number at present in tropical locations, of which there is  
196 some evidence [40]. Interesting analogies may apply by considering the dynamics of influenza  
197 B, which has a lower  $R_0$  and has a polyphyletic tree for the surface protein (hemagglutinin),  
198 compared to the monophyletic tree for influenza A. Drilling into such comparative details is an  
199 important area for future work. While our results are based on changes to specific humidity,  
200 we find that including a hypothesized effect of precipitation on transmission does not alter our  
201 main conclusions (Fig. S9) [17, 41]. Our results suggest that while climatic and demographic  
202 change may lead to milder epidemics in the future, this could come at the cost of higher risk for  
203 evolved strains. Further, the African continent could become a locus for new strain emergence.  
204 This may be exacerbated by increased mobility in the region, as populations grow, a factor not  
205 explicitly addressed here. Increasing surveillance of influenza strains in Africa could help con-  
206 trol efforts in the future. More broadly, our results indicate that while climate change will have  
207 a substantial impact on public health, one must also consider the projected major changes to  
208 population in the context of infectious agents.

## 209 **Methods**

### 210 **Data**

211 Historical specific humidity data come from NASA's Modern-Era Retrospective analysis for Re-  
212 search and Applications (MERRA) dataset, available gridded at a resolution of  $0.5^\circ$  latitude and  
213  $0.625^\circ$  longitude. Climate change projections come from the multi-model "business as usual"

214 (RCP8.5) scenario of the Coupled Model Intercomparison Project Phase 5 (CMIP5), linearly  
215 downscaled to match the MERRA data, with specific humidity derived from temperature and  
216 relative humidity projections (holding relative humidity constant [42]). We average projected  
217 (and baseline) climate over a 10 year window preceding the target data i.e. 2100 climate is  
218 2091-2100 averaged). Climate data is shown within land borders. The land border shapefile  
219 was downloaded from *thematicmapping.org*.

220 Baseline population data come from the Center for International Earth Science Information  
221 Network (CIESIN). Future projections are based on data from the United Nations World Pop-  
222 ulation Prospects as well as the Global Population Projection Grids Based on Shared Socioe-  
223 conomic Pathways (SSPs), accessed via CIESIN [38]. In the UN population scenario, we take  
224 the CIESIN gridded population data and multiply by the national-level UN projected changes.  
225 This assumes no change to spatial density of population. SSP population projections for 2010  
226 and all following years are taken from the gridded datasets developed by Jones et al.[38] The  
227 UN projections and the SSPs have slightly different baselines.

## 228 **Model**

229 Our influenza model is based on [10], specifically:

$$\frac{dS}{dT} = \frac{N - S - I}{L} - \frac{\beta(t)IS}{N} \quad (1)$$

230

$$\frac{dI}{dT} = \frac{\beta(t)IS}{N} - \frac{I}{D} \quad (2)$$

231 where  $S$  is the susceptible population,  $I$  is the number of infectious individuals and  $N$  is the  
232 population.  $L$  represents the duration of immunity and  $D$  is the mean infectious period.  $\beta(t)$   
233 is the contact rate at time  $t$  and is related to the basic reproductive number by  $R_0(t) = \beta(t)D$ .  
234  $R_0$  has a dependency on specific humidity  $q(t)$ , based on laboratory experiments [20, 10], given

235 by:

$$R_0(t) = \exp(a * q(t) + \log(R_{0max} - R_{0min})) + R_{0min} \quad (3)$$

236 where  $a$  is found to be -180 and  $R_{0max}$ ,  $R_{0min}$  are the maximum and minimum daily reproduc-  
237 tive numbers respectively.

238 Here, we take values for  $R_{0min}$  and  $R_{0max}$  from published estimates [10]. In baseline pro-  
239 jections, we use  $R_{0min} = 1.2$  and  $R_{0max} = 2.2$  as candidate values, though our results are robust  
240 to using a range of values (Fig. S3). We take  $D$  to be four days, representing (approximate)  
241 mean estimates from the literature (studies using a similar model have found values of 2-3.75  
242 [10] and 4.43-5.26 [43]). We use a value of 45 weeks to represent the duration of immunity,  $L$ .  
243 While this is shorter than the single outbreak estimates used in earlier studies, this value allows  
244 epidemics to emerge annually, representing the evolution of novel strains to which hosts are not  
245 yet immune.

## 246 HMI

247 Population genetics theory suggests that genetic diversity in a fluctuating population (in this  
248 case, virus population) may be related to the harmonic mean of the population size over time  
249 [29, 35, 34]. The harmonic mean provides a measure of the effective population size and has  
250 been applied in studies of virus populations [36], and more recently to epidemiological scenar-  
251 ios [33]. We assume population size is equal to incidence in hosts, measured at each generation  
252 time step (assumed to be a week). We first define harmonic mean incidence per capita as:

$$HMI^* = \frac{52}{\sum_{t=1}^{52} (N/x_t)} \quad (4)$$

253 where  $x_t$  is incidence at time  $t$ , where  $t$  is a week in a year.  $N$  is the human population in a  
254 particular location. Because our model is deterministic, weekly incidence is the same year-to-  
255 year, so  $HMI^*$  is dependent on intra-annual changes to incidence only.

256  $HMI^*$  gives the per capita harmonic mean incidence within a particular location, and al-

257 lows us to consider global suitability for influenza evolution without accounting for demo-  
258 graphic factors. We also define HMI by:

$$HMI = \frac{52}{\sum_{t=1}^{52} (1/x_t)} \quad (5)$$

259 which is the absolute harmonic mean incidence, accounting for demography. In practice, we  
260 first calculate  $HMI^*$  by running an influenza model for all locations, setting  $N = 1$  and then  
261 multiply this by gridded population size numbers i.e.

$$HMI = HMI^* \times N \quad (6)$$

262 HMI is highly correlated with the absolute depth of trough, measured as the minimum annual  
263 incidence (Fig. S2).

## 264 **Nucleotide diversity**

265 We analyzed HA sequence dataset of human influenza viruses H1NX and H3NX in tropical  
266 regions and north temperate regions, using sequences from the Global Initiative on Sharing All  
267 Influenza Data (GISAID). We chose six representative locations with sufficient data availability  
268 at the sub-yearly level. We selected England and New York to represent north temperate loca-  
269 tions, while Hawaii, Hong Kong, Singapore and Taiwan for tropical locations, with the sampling  
270 date from 2007 to 2019 (a time period in which all locations had data). Only sequences covering  
271 at least 70% of full length were retained. Sequences were annotated with available collection  
272 date and aligned with MAFFT [44], and edited manually. Accession numbers of sequences are  
273 provided at [github/rebaker64/flu](https://github.com/rebaker64/flu).

274 With the sequence data, we calculated the pairwise nucleotide distance between sequences  
275 under the molecular evolutionary models of K80 [45] with 'ape' package [46] in R v3.5.2.  
276 To get the nucleotide diversity in each quarter of each year, we divided the sum of pairwise  
277 distances between sequences in each quarter by the number of comparisons [47]. With the

278 quarterly nucleotide diversity, we averaged the diversity by quarter over 13 years (2007 – 2019).  
279 If no sequences were available for a particular quarter and location, the diversity was recorded  
280 as zero.

### 281 **Locus of genetic diversity**

282 We calculate the inverse distance weighted average of HMI for each location on the globe (using  
283 minimum distances on the spherical surface). The location with the maximum average value is  
284 labelled as the locus of genetic diversity. Locations with the top 10% HMI in 2010 and 2100  
285 are shown in Fig. S7.

## 286 **Acknowledgements**

287 This work is supported by the Cooperative Institute for Modeling the Earth System (CIMES)  
288 (REB), US National Institutes of Health grant GM110748 (JS), Natural Sciences and Engi-  
289 neering Research Council (NSERC) of Canada (PGS-D to CMSR), the James S. McDonnell  
290 Foundation 21st Century Science Initiative Collaborative Award in Understanding Dynamic  
291 and Multi-scale Systems (CMSR).

## 292 **Author Contributions**

293 Conceptualization: REB, GV, CJEM, BTG; Data curation: REB, GV, WY; Formal analysis:  
294 REB; Methodology: REB, CJW, CMSR, CV, JS, CJEM, GV, BTG; Software: REB; Visual-  
295 ization: REB; Writing, original draft: REB, BTG; Writing, reviewing and editing: REB, CJW,  
296 CMSR, CV, JS, CJEM, GV, BTG .

## 297 **Competing Interests**

298 The authors declare no competing interests.

## 299 **Data Availability**

300 All data used in this study are publicly available. Baseline climate data are available from  
301 NASA's Modern-Era Retrospective analysis for Research and Applications (MERRA). Climate  
302 projection data is downloaded from KNMI Climate Explorer. Baseline population data are from  
303 the Socioeconomic and Data Applications Center and SSP population projections are from the  
304 same source. We also use population projections from the UN Department of Social and Eco-  
305 nomic Affairs. Hong Kong influenza data used in Fig. S9 is available from the Department of  
306 Health, The Government of the Hong Kong Special Administrative Region. The complete ac-



307 cession list of sequences used in the phylogenetic analysis are available at *github/rebaker64/flu*.  
308 Sequence data come from the Global Initiative on Sharing All Influenza Data (GISAID).

## 309 Code Availability

310 Code for recreating the main results is available at *github/rebaker64/flu*.

## 311 References

- 312 [1] Metcalf, C. J. E. *et al.* Identifying climate drivers of infectious disease dynamics: recent  
313 advances and challenges ahead. *Proceedings of the Royal Society B: Biological Sciences*  
314 **284**, 20170901 (2017).
- 315 [2] Mahmud, A. S., Martinez, P. P., He, J. & Baker, R. E. The impact of climate change on  
316 vaccine-preventable diseases: Insights from current research and new directions. *Current*  
317 *environmental health reports* 1–8 (2020).
- 318 [3] Mordecai, E. A. *et al.* Optimal temperature for malaria transmission is dramatically lower  
319 than previously predicted. *Ecology letters* **16**, 22–30 (2013).
- 320 [4] Caminade, C. *et al.* Impact of climate change on global malaria distribution. *Proceedings*  
321 *of the National Academy of Sciences* **111**, 3286–3291 (2014).
- 322 [5] Yamana, T. K. & Eltahir, E. A. Projected impacts of climate change on environmental  
323 suitability for malaria transmission in west africa. *Environmental health perspectives* **121**,  
324 1179–1186 (2013).
- 325 [6] Baker, R. E., Mahmud, A. S. & Metcalf, C. J. E. Dynamic response of airborne infections  
326 to climate change: predictions for varicella. *Climatic Change* **148**, 547–560 (2018).

- 327 [7] Baker, R. E. *et al.* Epidemic dynamics of respiratory syncytial virus in current and future  
328 climates. *Nature Communications* **10**, 1–8 (2019).
- 329 [8] Dalziel, B. D. *et al.* Urbanization and humidity shape the intensity of influenza epidemics  
330 in us cities. *Science* **362**, 75–79 (2018).
- 331 [9] Lowen, A. C. & Steel, J. Roles of humidity and temperature in shaping influenza season-  
332 ality. *Journal of virology* **88**, 7692–7695 (2014).
- 333 [10] Shaman, J., Pitzer, V. E., Viboud, C., Grenfell, B. T. & Lipsitch, M. Absolute humidity and  
334 the seasonal onset of influenza in the continental united states. *PLoS biology* **8**, e1000316  
335 (2010).
- 336 [11] Grenfell, B. T., Bjørnstad, O. N. & Kappey, J. Travelling waves and spatial hierarchies in  
337 measles epidemics. *Nature* **414**, 716–723 (2001).
- 338 [12] Metcalf, C. J. E. *et al.* Modelling the first dose of measles vaccination: the role of maternal  
339 immunity, demographic factors, and delivery systems. *Epidemiology & Infection* **139**,  
340 265–274 (2011).
- 341 [13] Webster, R., Laver, W., Air, G. & Schild, G. Molecular mechanisms of variation in in-  
342 fluenza viruses. *Nature* **296**, 115 (1982).
- 343 [14] Petrova, V. N. & Russell, C. A. The evolution of seasonal influenza viruses. *Nature*  
344 *Reviews Microbiology* **16**, 47 (2018).
- 345 [15] Crank, M. C., Mascola, J. R. & Graham, B. S. Preparing for the next influenza pandemic:  
346 the development of a universal influenza vaccine. *The Journal of infectious diseases* **219**,  
347 S107–S109 (2019).
- 348 [16] Viboud, C., Alonso, W. J. & Simonsen, L. Influenza in tropical regions. *PLoS medicine* **3**,  
349 e89 (2006).

- 350 [17] Tamerius, J. *et al.* Global influenza seasonality: reconciling patterns across temperate and  
351 tropical regions. *Environmental health perspectives* **119**, 439–445 (2010).
- 352 [18] Alonso, W. J. *et al.* Seasonality of influenza in brazil: a traveling wave from the amazon  
353 to the subtropics. *American journal of epidemiology* **165**, 1434–1442 (2007).
- 354 [19] Nelson, M. I. & Holmes, E. C. The evolution of epidemic influenza. *Nature reviews*  
355 *genetics* **8**, 196 (2007).
- 356 [20] Shaman, J. & Kohn, M. Absolute humidity modulates influenza survival, transmission,  
357 and seasonality. *Proceedings of the National Academy of Sciences* **106**, 3243–3248 (2009).
- 358 [21] Lowen, A. C., Mubareka, S., Steel, J. & Palese, P. Influenza virus transmission is depen-  
359 dent on relative humidity and temperature. *PLoS pathogens* **3**, e151 (2007).
- 360 [22] Lipsitch, M. & Viboud, C. Influenza seasonality: lifting the fog. *Proceedings of the*  
361 *National Academy of Sciences* **106**, 3645–3646 (2009).
- 362 [23] Grenfell, B. T. *et al.* Unifying the epidemiological and evolutionary dynamics of  
363 pathogens. *science* **303**, 327–332 (2004).
- 364 [24] Bahl, J. *et al.* Temporally structured metapopulation dynamics and persistence of influenza  
365 a h3n2 virus in humans. *Proceedings of the National Academy of Sciences* **108**, 19359–  
366 19364 (2011).
- 367 [25] Nelson, M. I. *et al.* Stochastic processes are key determinants of short-term evolution in  
368 influenza a virus. *PLoS pathogens* **2**, e125 (2006).
- 369 [26] Cox, N. & Subbarao, K. Global epidemiology of influenza: past and present. *Annual*  
370 *review of medicine* **51**, 407–421 (2000).
- 371 [27] Russell, C. A. *et al.* The global circulation of seasonal influenza a (h3n2) viruses. *Science*  
372 **320**, 340–346 (2008).

- 373 [28] Wen, F., Bedford, T. & Cobey, S. Explaining the geographical origins of seasonal influenza  
374 a (h3n2). *Proceedings of the Royal Society B: Biological Sciences* **283**, 20161312 (2016).
- 375 [29] Nei, M., Maruyama, T. & Chakraborty, R. The bottleneck effect and genetic variability in  
376 populations. *Evolution* **29**, 1–10 (1975).
- 377 [30] Ferguson, N. M., Galvani, A. P. & Bush, R. M. Ecological and immunological determi-  
378 nants of influenza evolution. *Nature* **422**, 428 (2003).
- 379 [31] Koelle, K., Cobey, S., Grenfell, B. & Pascual, M. Epochal evolution shapes the phylody-  
380 namics of interpandemic influenza a (h3n2) in humans. *Science* **314**, 1898–1903 (2006).
- 381 [32] Koelle, K., Khatri, P., Kamradt, M. & Kepler, T. B. A two-tiered model for simulating the  
382 ecological and evolutionary dynamics of rapidly evolving viruses, with an application to  
383 influenza. *Journal of The Royal Society Interface* **7**, 1257–1274 (2010).
- 384 [33] Worby, C. *et al.* Interpreting pathogen genetic diversity during measles epidemics. *bioRxiv*  
385 (2020). URL [https://www.biorxiv.org/content/early/2020/01/31/](https://www.biorxiv.org/content/early/2020/01/31/2020.01.30.926998)  
386 [2020.01.30.926998](https://www.biorxiv.org/content/early/2020/01/31/2020.01.30.926998).
- 387 [34] Ewens, W. The probability of survival of a new mutant in a fluctuating environment.  
388 *Heredity* **22**, 438 (1967).
- 389 [35] Karlin, S. Rates of approach to homozygosity for finite stochastic models with variable  
390 population size. *The American Naturalist* **102**, 443–455 (1968).
- 391 [36] Rousseau, E. *et al.* Estimating virus effective population size and selection without neutral  
392 markers. *PLoS pathogens* **13**, e1006702 (2017).
- 393 [37] Bedford, T. *et al.* Global circulation patterns of seasonal influenza viruses vary with anti-  
394 genic drift. *Nature* **523**, 217–220 (2015).
- 395 [38] Jones, B. & O’Neill, B. C. Spatially explicit global population scenarios consistent with  
396 the shared socioeconomic pathways. *Environmental Research Letters* **11**, 084003 (2016).

- 397 [39] Ballester, J., Rodó, X., Robine, J.-M. & Herrmann, F. R. European seasonal mortality and  
398 influenza incidence due to winter temperature variability. *Nature Climate Change* **6**, 927  
399 (2016).
- 400 [40] Chowell, G., Viboud, C., Simonsen, L., Miller, M. & Alonso, W. J. The reproduction  
401 number of seasonal influenza epidemics in Brazil, 1996–2006. *Proceedings of the Royal  
402 Society B: Biological Sciences* **277**, 1857–1866 (2010).
- 403 [41] Tamerius, J. D. *et al.* Environmental predictors of seasonal influenza epidemics across  
404 temperate and tropical climates. *PLoS pathogens* **9**, e1003194 (2013).
- 405 [42] Allen, M. R. & Ingram, W. J. Constraints on future changes in climate and the hydrologic  
406 cycle. *Nature* **419**, 228–232 (2002).
- 407 [43] Yang, W., Lipsitch, M. & Shaman, J. Inference of seasonal and pandemic influenza trans-  
408 mission dynamics. *Proceedings of the National Academy of Sciences* **112**, 2723–2728  
409 (2015).
- 410 [44] Katoh, K. & Standley, D. M. MAFFT multiple sequence alignment software version 7:  
411 improvements in performance and usability. *Molecular biology and evolution* **30**, 772–  
412 780 (2013).
- 413 [45] Kimura, M. A simple method for estimating evolutionary rates of base substitutions  
414 through comparative studies of nucleotide sequences. *Journal of molecular evolution* **16**,  
415 111–120 (1980).
- 416 [46] Paradis, E. & Schliep, K. ape 5.0: an environment for modern phylogenetics and evolu-  
417 tionary analyses in R. *Bioinformatics* **35**, 526–528 (2019).
- 418 [47] Paradis, E. pegas: an R package for population genetics with an integrated–modular ap-  
419 proach. *Bioinformatics* **26**, 419–420 (2010).
